# Supplementary material for: Porous organic–inorganic hybrid xerogels for stearic acid shape-stabilized phase change materials
Source: Royal Society of Chemistry journal article supplement (doi:10.1039/c6nj03034c), 2017-01-01
Supplement: c6nj03034c1.pdf [file c6nj03034c1.pdf]

Electronic Supplementary Material (ESI) for New Journal of Chemistry.  
This journal is © The Royal Society of Chemistry and the Centre National de la Recherche Scientifique 2016

## **Porous organic–inorganic hybrid xerogels for stearic acid shape-stabilized phase change material**

Radoelizo S. Andriamitantsoa, Wenjun Dong, Hongyi Gao, Ge Wang \*

Beijing Key Laboratory of Function Materials for Molecule & Structure Construction, School of Materials Science and Engineering, University of Science and Technology Beijing, Beijing 100083, P.R China.

Corresponding Author: gewang@mater.ustb.edu.cn

### *Supplementary material*

#### **Tables of contents**

|                                         |        |
|-----------------------------------------|--------|
| Scanning Electron Microscopy (SEM)      | S1-S2  |
| Differential scanning calorimetry (DSC) | S3-S14 |

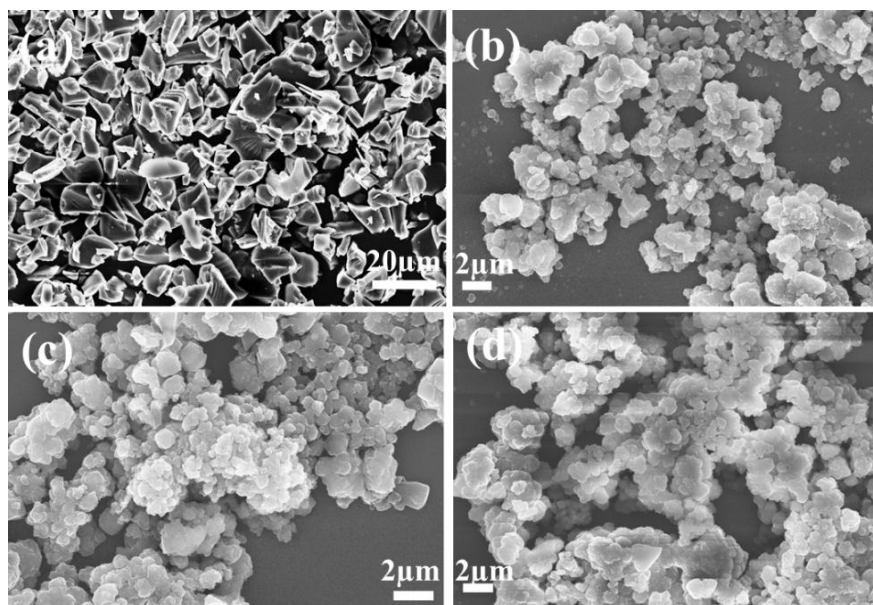

**Fig S1.** SEM images of (a) Pure stearic acid, (b) 50%-SA@MIL-100 (Cr), (c) 60%-SA@MIL-100 (Cr), (d) 70%-SA@MIL-100 (Cr).

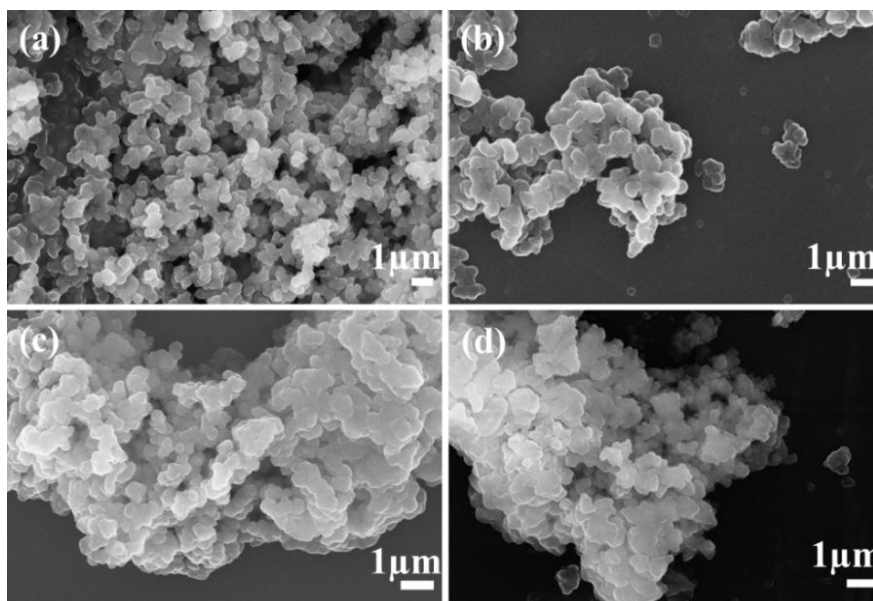

**Fig S2.** SEM images of (a) 50%-SA@MOG-100 (Cr), (b) 60%-SA@MOG-100 (Cr), (c) 70%-SA@MOG-100 (Cr), (d) 90%-SA@MOG-100 (Cr).

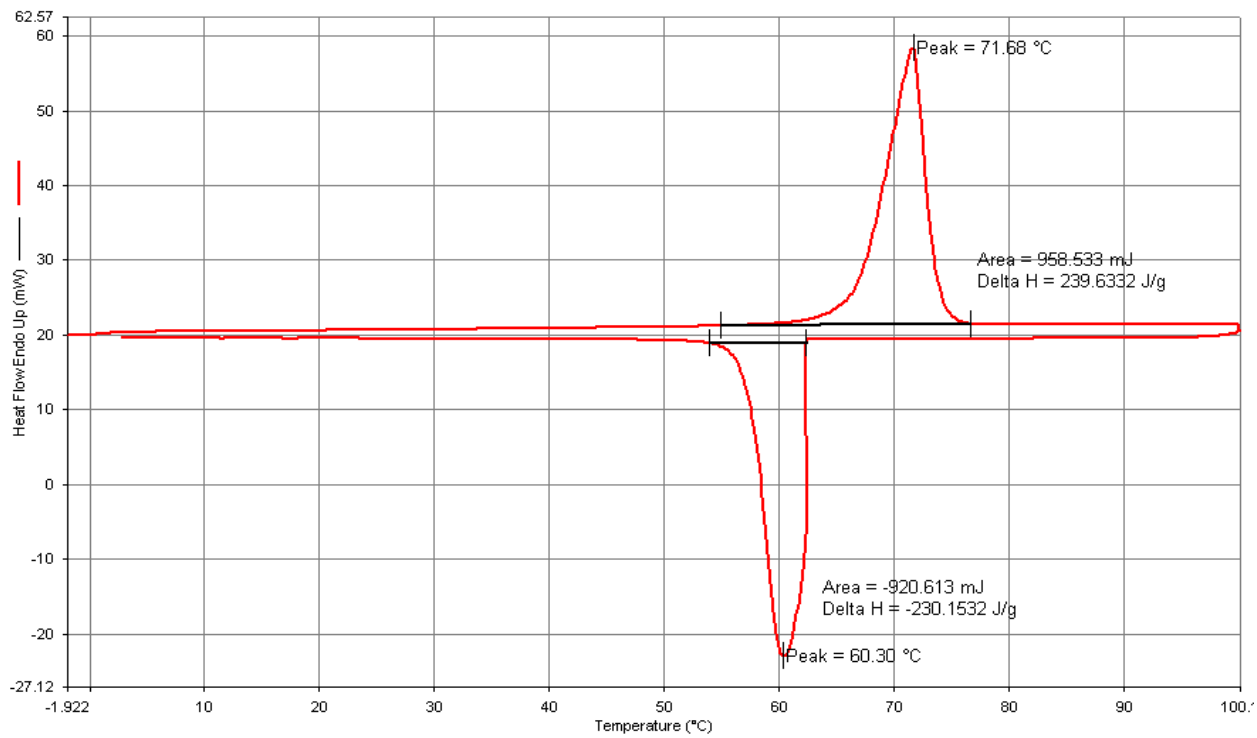

**Fig S3. DSC curves of pure SA.**

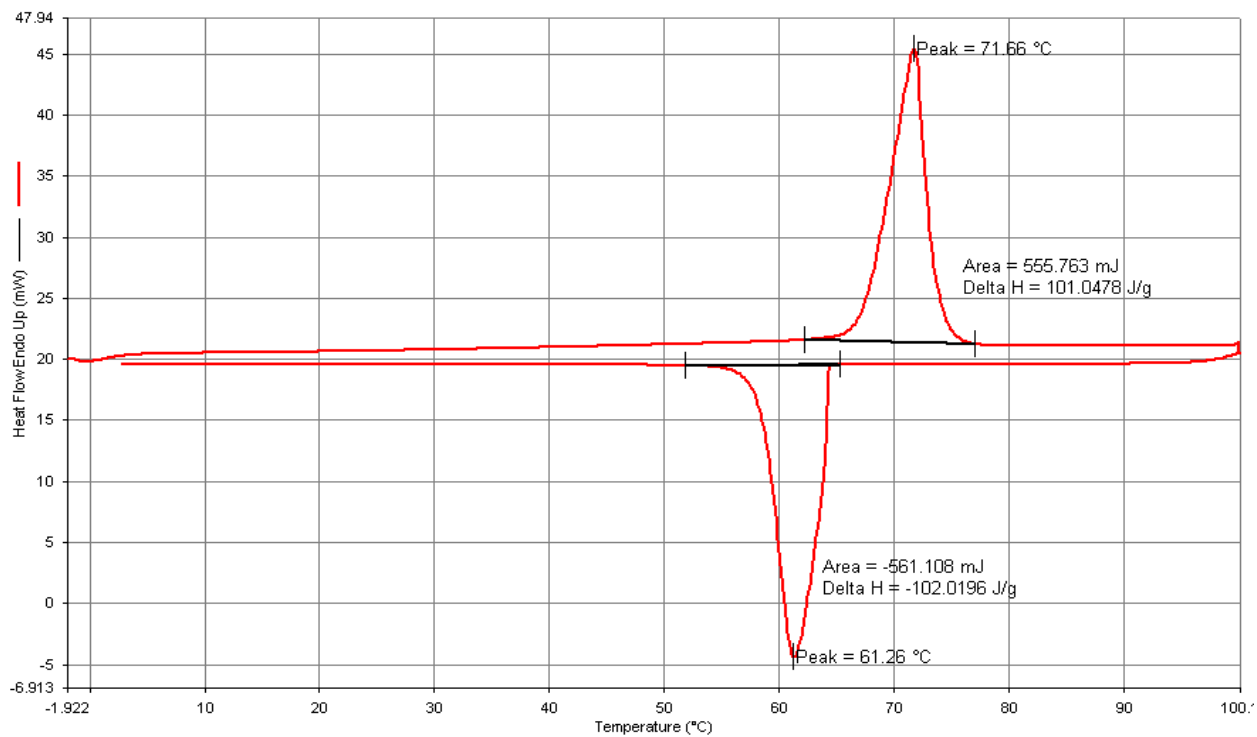

**Fig S4. DSC curves of 50% SA@@MOG-100 (Cr) composite PCMs.**

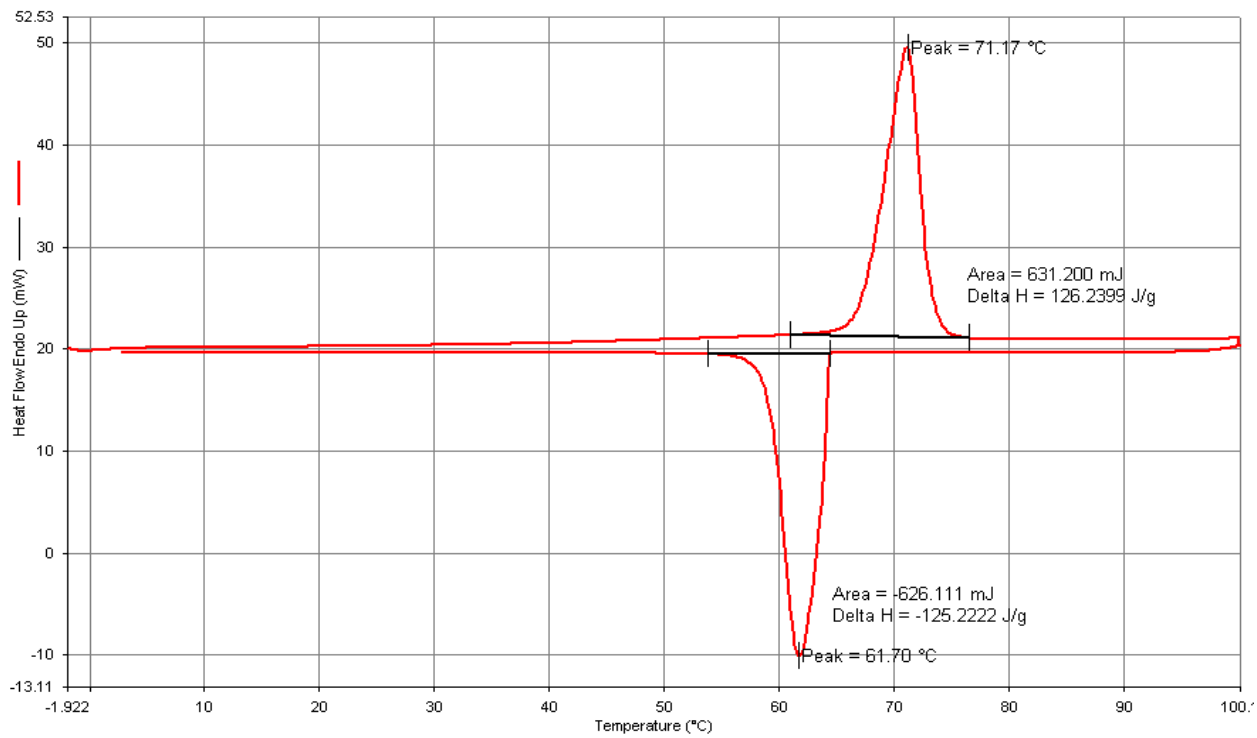

**Fig S5. DSC curves of 60% SA@MOG-100 (Cr) composite PCMs.**

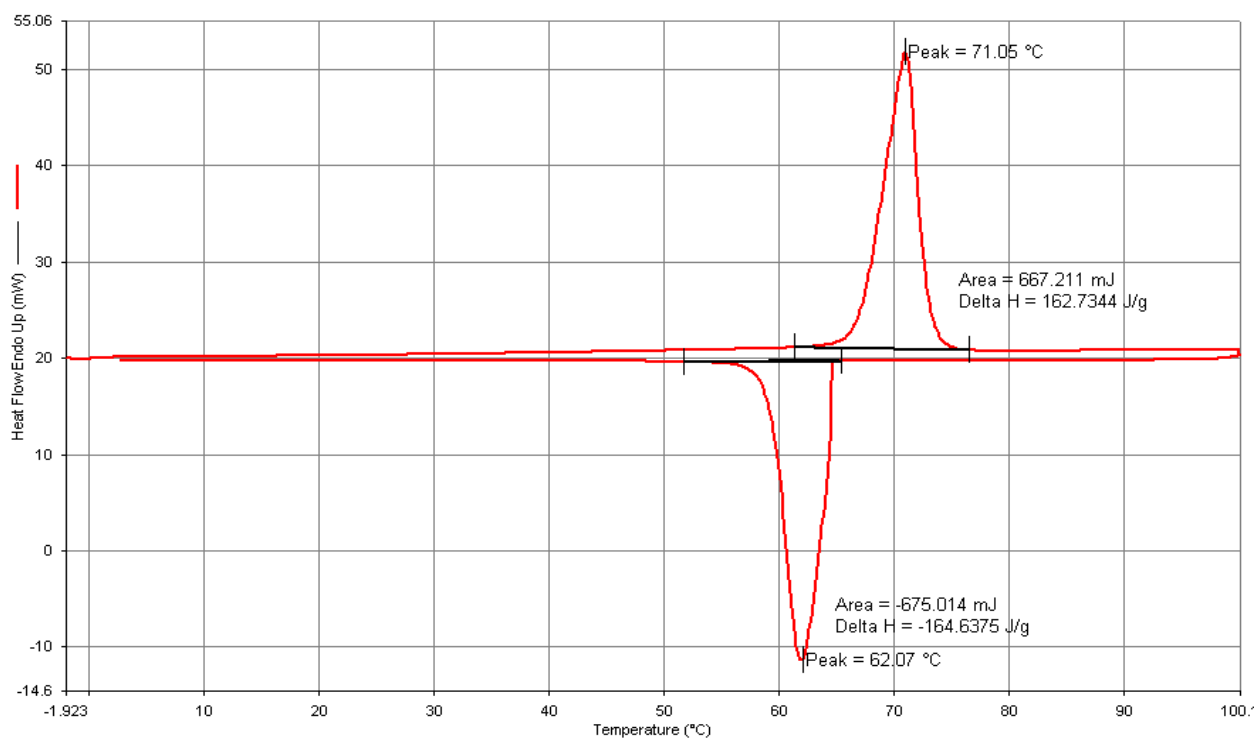

**Fig S6. DSC curves of 70% SA@MOG-100 (Cr) composite PCMs.**

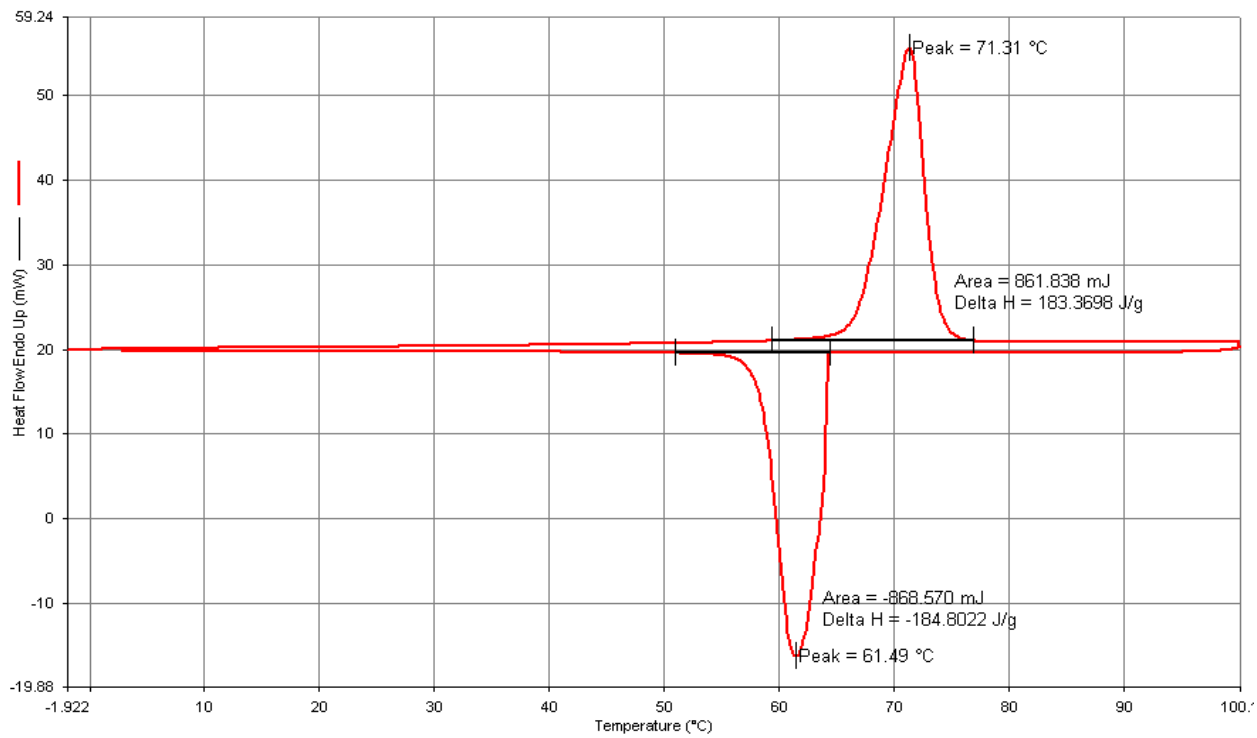

**Fig S7. DSC curves of 80% SA@MOG-100 (Cr) composite PCMs.**

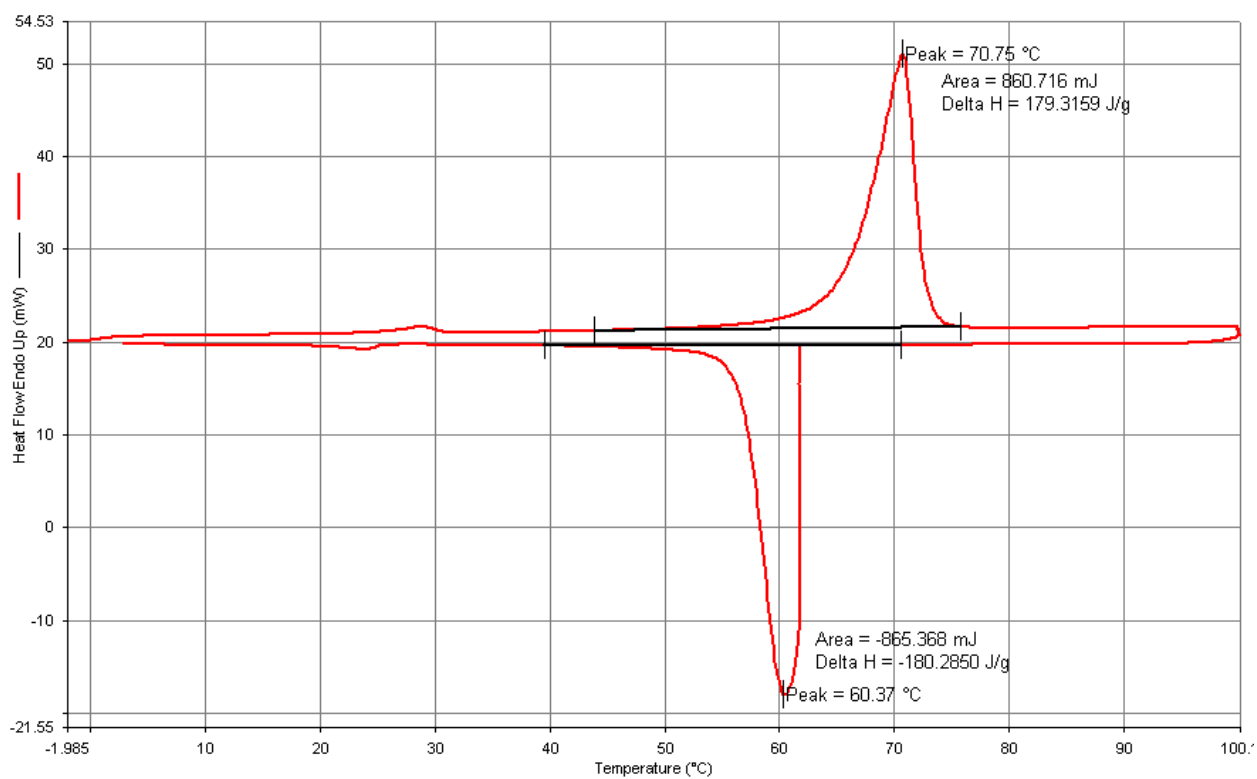

**Fig S8. DSC curves of 80% SA@MOG-100 (Cr) composite PCMs.**

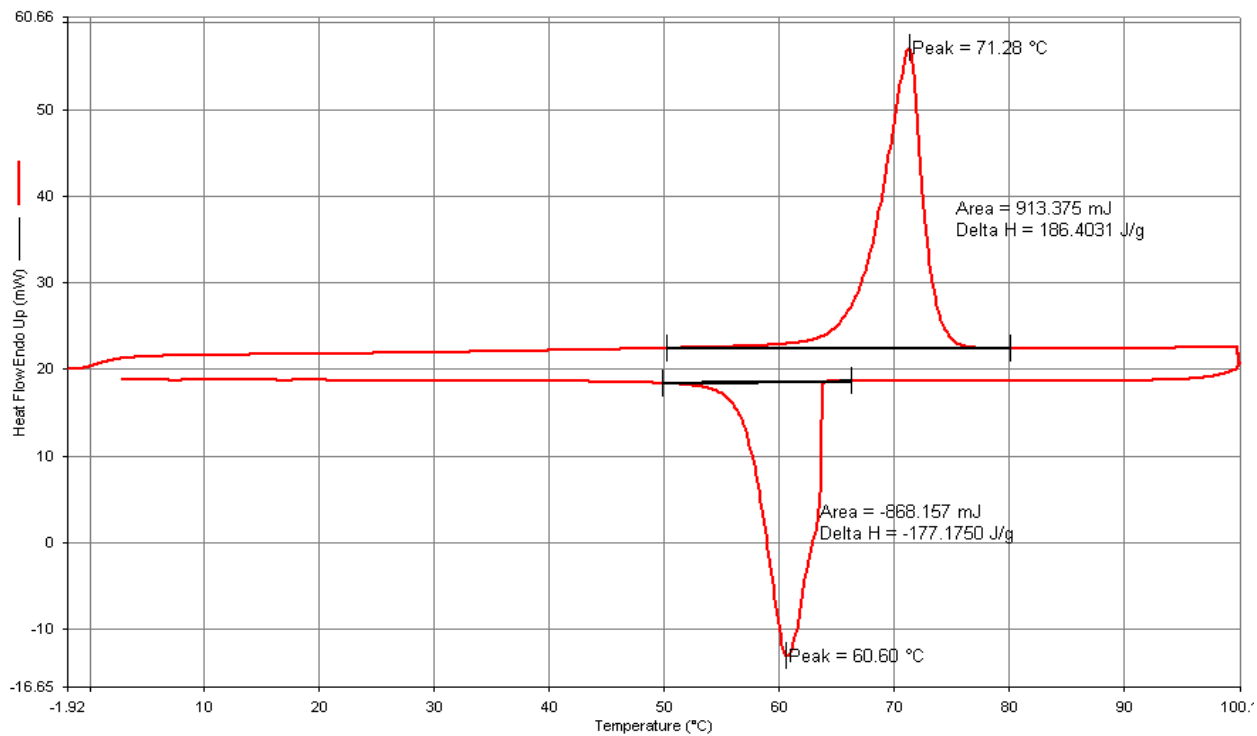

**Fig S9. DSC curves of 85% SA@MOG-100 (Cr) composite PCMs.**

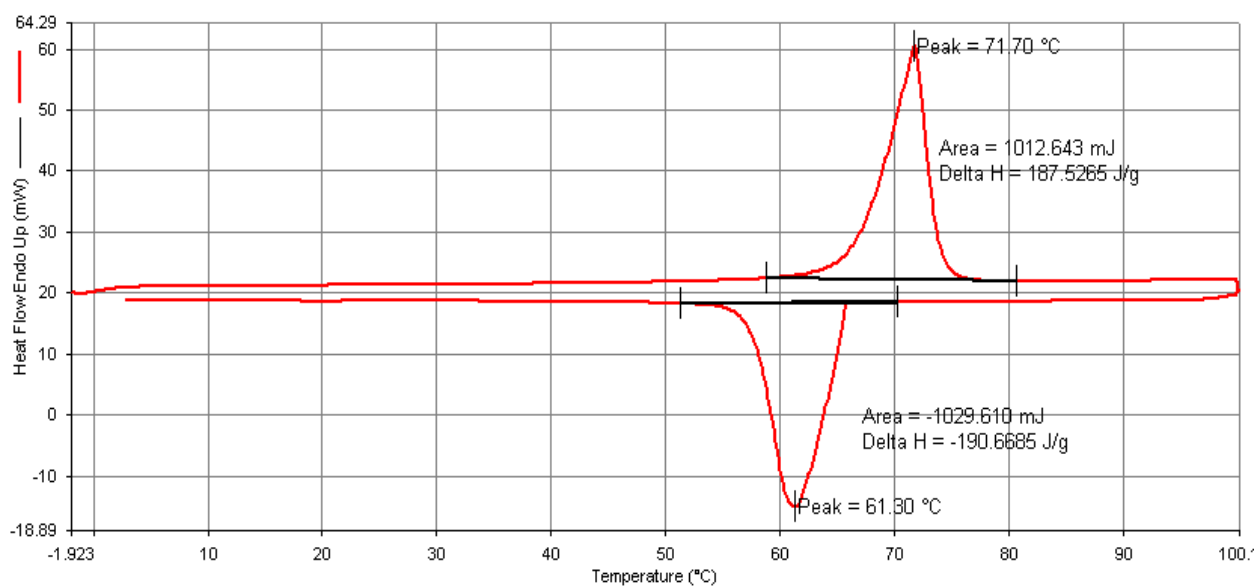

**Fig S10. DSC curves of 87% SA@MOG-100 (Cr) composite PCMs.**

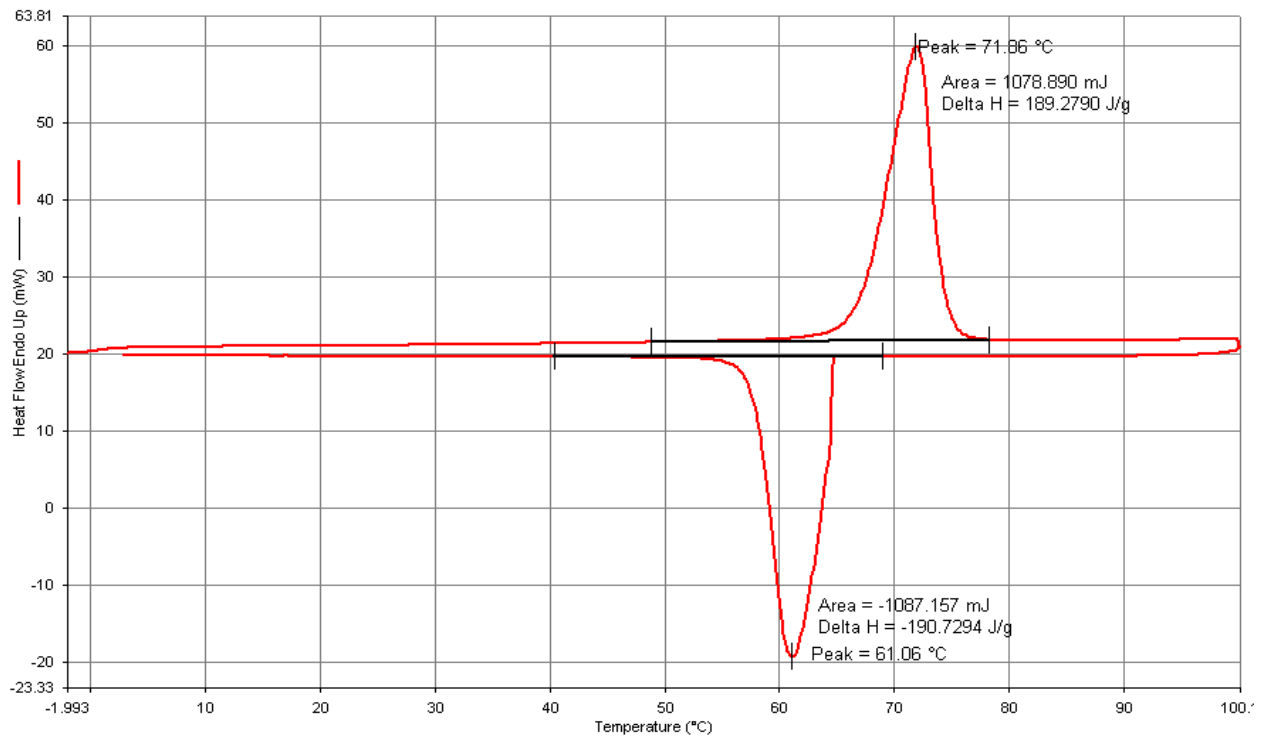

**Fig S11. DSC curves of 90% SA@MOG-100 (Cr) composite PCMs.**

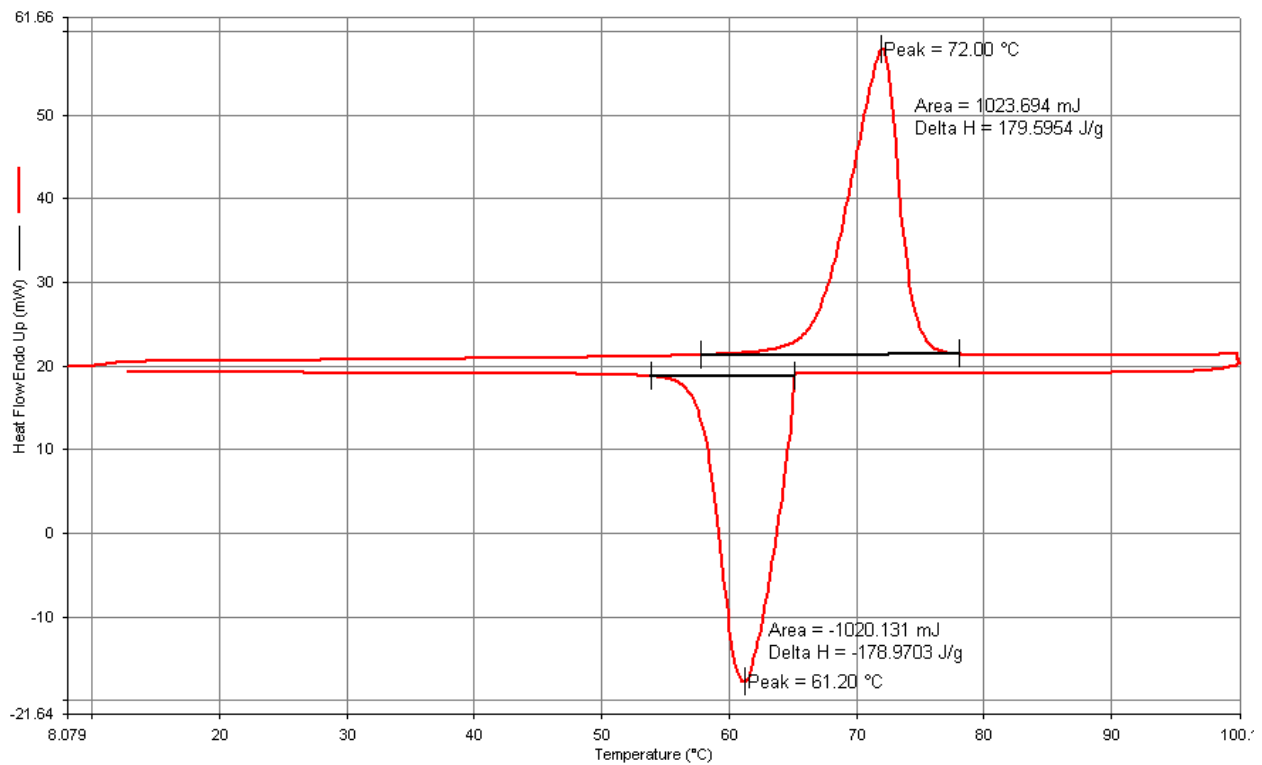

**Fig S12. DSC curves of 90%-SA@MOG-100 (Cr) composites under 5 thermal cycles.**

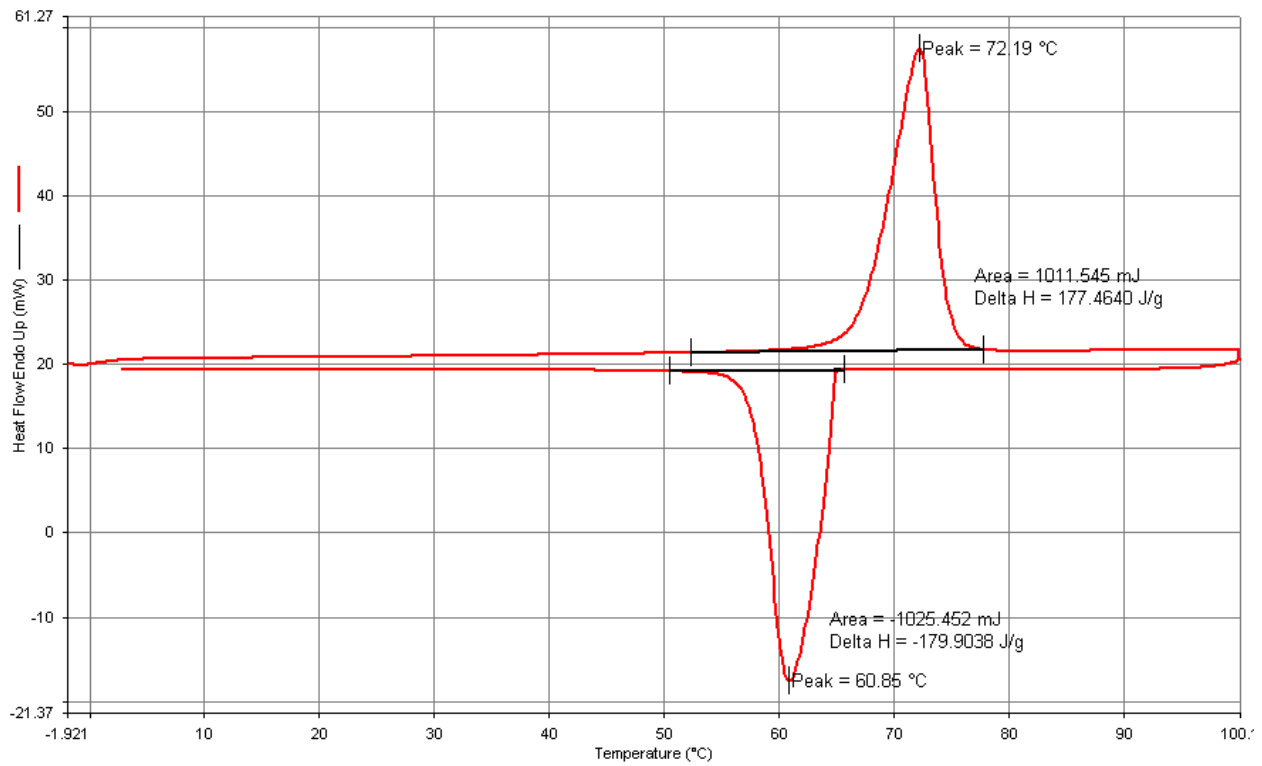

**Fig S13. DSC curves of 90%-SA@MOG-100 (Cr) composites under 10 thermal cycles.**

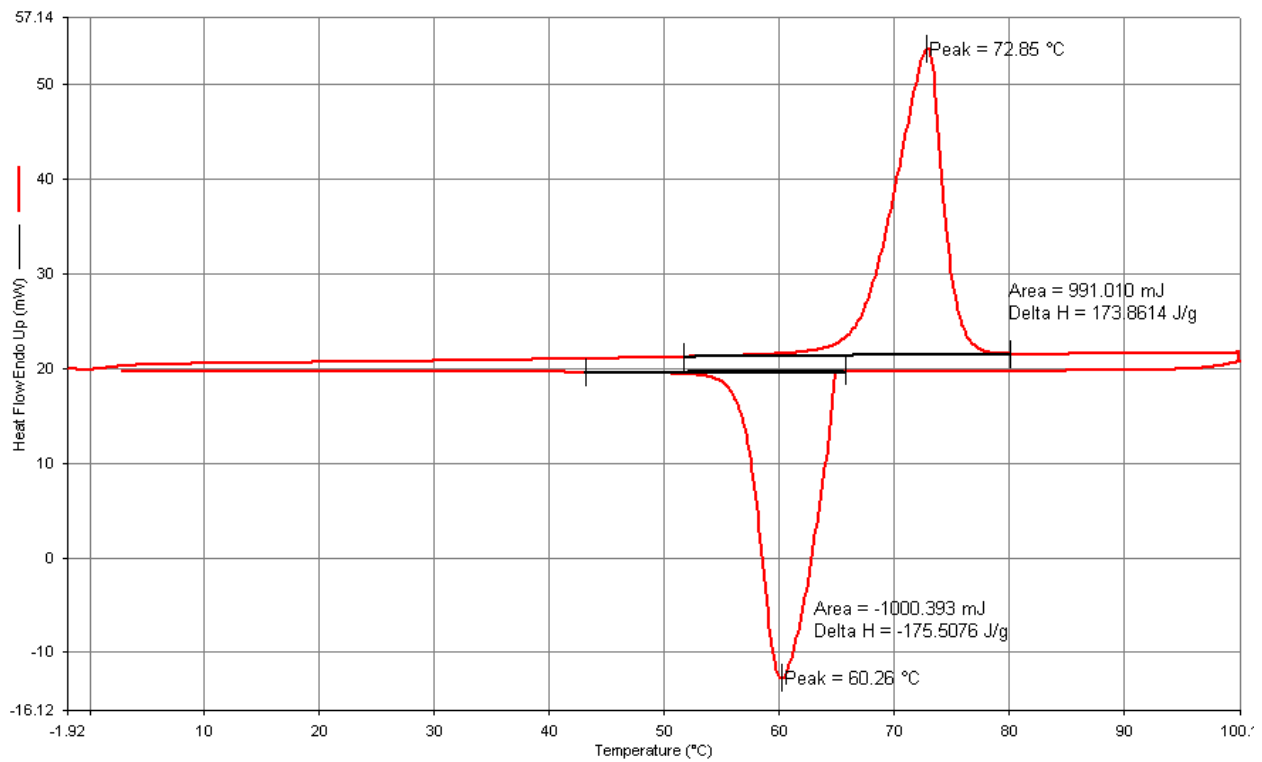

**Fig S14. DSC curves of 90%-SA@MOG-100 (Cr) composites under 15 thermal cycles.**
